# Supplementary material
Source: PubMed Central journal article supplement (PMC5518986)
Supplement: cr201760x2.pdf [file cr201760x2.pdf]

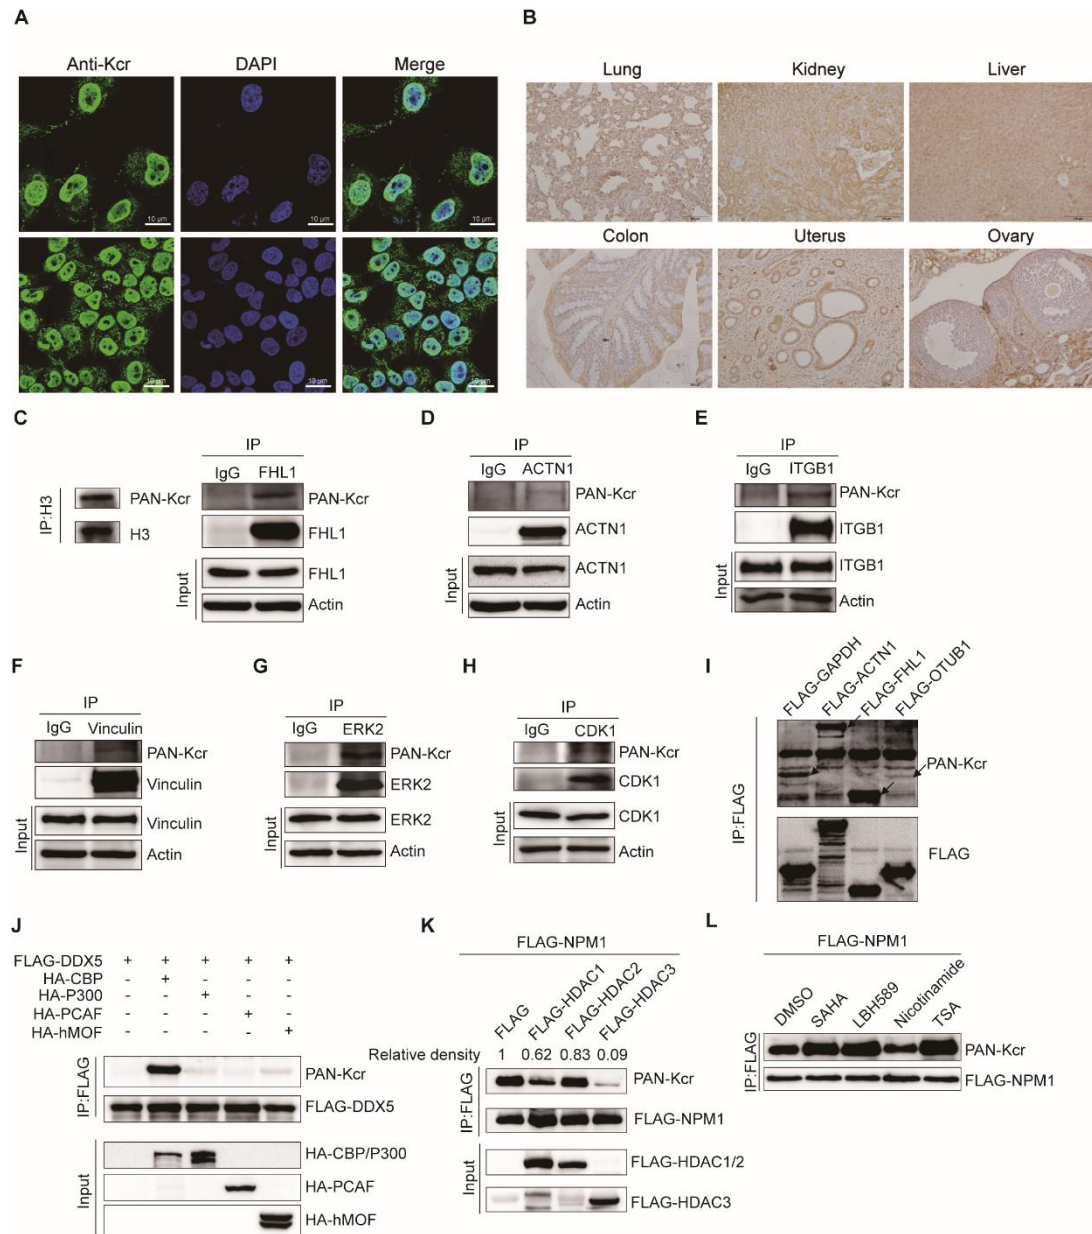

## Supplementary Figure S2

(A) The crotonylation proteins were detected in H1299 and HeLa cells by immunofluorescence using an anti-Kcr antibody (green), and the nuclei was stained with DAPI (blue), followed by visualization with confocal microscopy. Scale bars: 10 $\mu$ m.

(B) The crotonylation proteins were detected in multiple mouse tissues by immunohistochemistry using an anti-Kcr antibody.

(C-H) Endogenous validation of lysine crotonylated proteins. H1299 cells were treated

with 3 $\mu$ M TSA and 5mM nicotinamide for 12h, and then cell lysates were immunoprecipitated with the antibody of H3, FHL1, ACTN1, ITGB1, Vinculin, ERK2, and CDK1 respectively, followed by immunoblotting with pan-Kcr antibody.

(I) Independent validation of lysine crotonylated proteins. H1299 cells separately transfected with FLAG tagged GAPDH, ACTN1, FHL1 and OTUB1 were treated with 3 $\mu$ M TSA and 5mM nicotinamide for 12h, and then cell lysates were immunoprecipitated with an anti-FLAG antibody, followed by immunoblotting with pan-Kcr antibody.

(J) FLAG tagged DDX5 expression vector was co-transfected into H1299 cells separately with a variety of acetyltransferases expression vectors. Forty-eight hours post transfection, cell lysates were immunoprecipitated with an anti-FLAG antibody, followed by Western blot analysis with pan-Kcr antibody.

(K) HDAC1 and HDAC3 deacetylated NPM1 in vivo. H1299 cells were co-transfected separately with expression vectors containing FLAG-NPM1, HA-CBP and HDAC1, HDAC2, HDAC3. Western blot analysis was performed with pan-Kcr antibody.

(L) The HDAC inhibitor SAHA and LBH589 increased the NPM1 crotonylation level. H1299 cells were transfected with FLAG-NPM1 and HA-CBP, then treated respectively with 3 $\mu$ M TSA, 10 $\mu$ M SAHA, 150nM LBH589 or 5mM nicotinamide for 12 h. Cell lysates were immunoprecipitated with an anti-FLAG antibody, followed by Western blot analysis with a pan-Kcr antibody.
